# Supplementary material for: Members of the abscisic acid co‐receptor PP2C protein family mediate salicylic acid–abscisic acid crosstalk
Source: PubMed Central journal article supplement (PMC6508495; doi:10.1002/pld3.20), 2017-11-06
Supplement: PLD3-1-e00020-s008.pdf [file PLD3-1-e00020-s008.pdf]

**Table S1: List of primers used in the experiments. “q” indicates primers used for qPCR analysis**

|                  |                                    |
|------------------|------------------------------------|
| <i>ABI1-F</i>    | GGA CATATG ATGGAGGAAGTATCTCCGGCG   |
| <i>ABI1-R</i>    | GGA GGATCC TCAGTTCAAGGGTTTGCTCTTG  |
| <i>ABI2-F</i>    | GGA CATATG ATGGACGAAGTTTCTCCTGCAG  |
| <i>ABI2-R</i>    | GGA GAGCTC TCAATTCAAGGATTTGCTCTTG  |
| <i>PP2C-D4-F</i> | GGACATATGATGGTATCTACAACATTTAGG     |
| <i>PP2C-D4-R</i> | GGAGAGCTCCTATAAAACGGGATTATGGGC     |
| <i>HAB1-F</i>    | GGA GGATCC ATGGAGGAGATGACTCCCGCAG  |
| <i>HAB1-R</i>    | GGA GAGCTC TCAGGTTCTGGTCTTGAACTTTC |
| <i>qABI1-F</i>   | CCATGGCGGTTTCTCAGGTAG              |
| <i>qABI1-R</i>   | CCACGTATCACCATCGCAGA               |
| <i>qABI2-F</i>   | CCATGGCGGTTTCTCAGGTAG              |
| <i>qABI2-R</i>   | ACCGTCACAAAACCTCCGGTT              |
| <i>qPP2CD-F</i>  | ATCATGAGAGCGGAACCGAC               |
| <i>qPP2CD-R</i>  | ACTTCCGAGCCACACCATTG               |
| <i>qAREB2-F</i>  | GCCAATCATGCCTAAGCAGC               |
| <i>qAREB2-R</i>  | CTCCACGGTGTAAGCCTGTT               |
| <i>qRD29A-F</i>  | GCACCAGGCGTAACAGGTAA               |
| <i>qED29A-R</i>  | GCAGAGAGACCGGAGTGTTTC              |
